# Supplementary material for: XAF1 Protects Host against Emerging RNA Viruses by Stabilizing IRF1-Dependent Antiviral Immunity
Source: PubMed Central journal article supplement (PMC9472610; doi:10.1128/jvi.00774-22), 2022-08-16
Supplement: jvi.00774-22-s0001.pdf [file jvi.00774-22-s0001.pdf]

1  
2  
3  
4

Supplementary Figures for  
**XAF1 protects host against emerging RNA viruses by  
stabilizing IRF1-dependent antiviral immunity**

Han Y. et al, Fig. S1

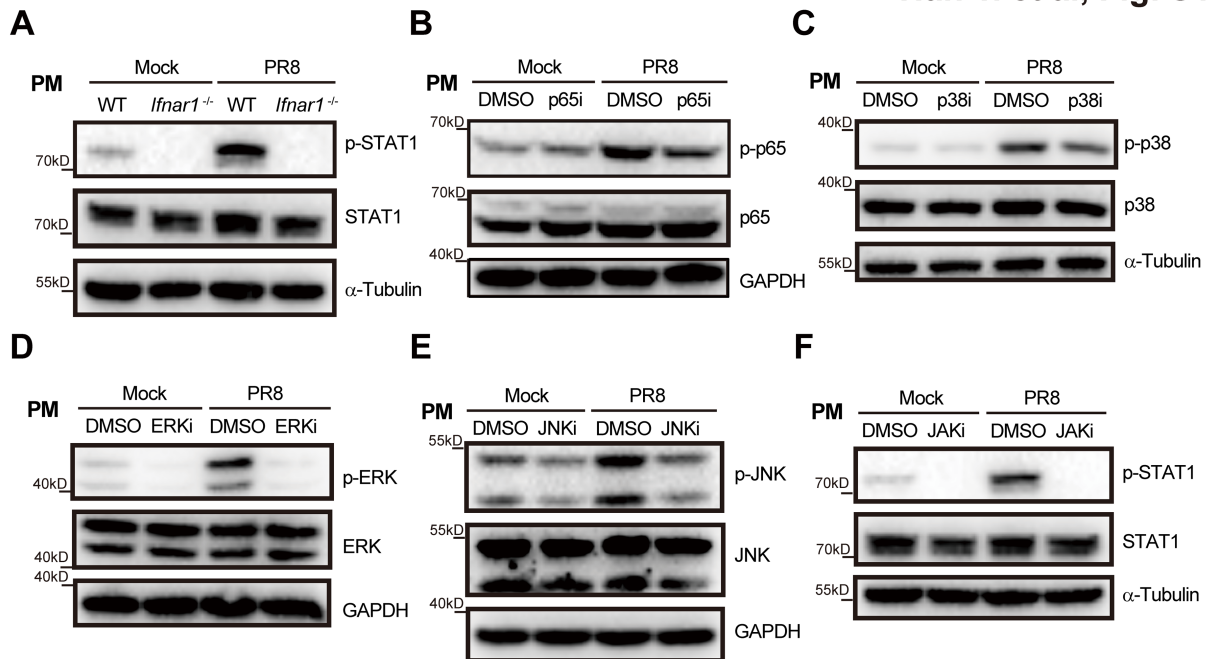

5 **Fig. S1.** Verification of the *Ifnar1*<sup>-/-</sup> PMs and kinase inhibitors. (A) Immunoblot  
6 analysis of indicated proteins in PMs from the WT and *Ifnar1*<sup>-/-</sup> mice infected  
7 with PR8 (MOI 0.1) for 4 h. (B-F) Immunoblot analysis of indicated proteins in  
8 the PMs pretreated for 1 h with the indicated inhibitors, followed by PR8  
9 infection (MOI 0.1) for 4 h. All data are representative results of three  
10 independent experiments.

11  
12  
13

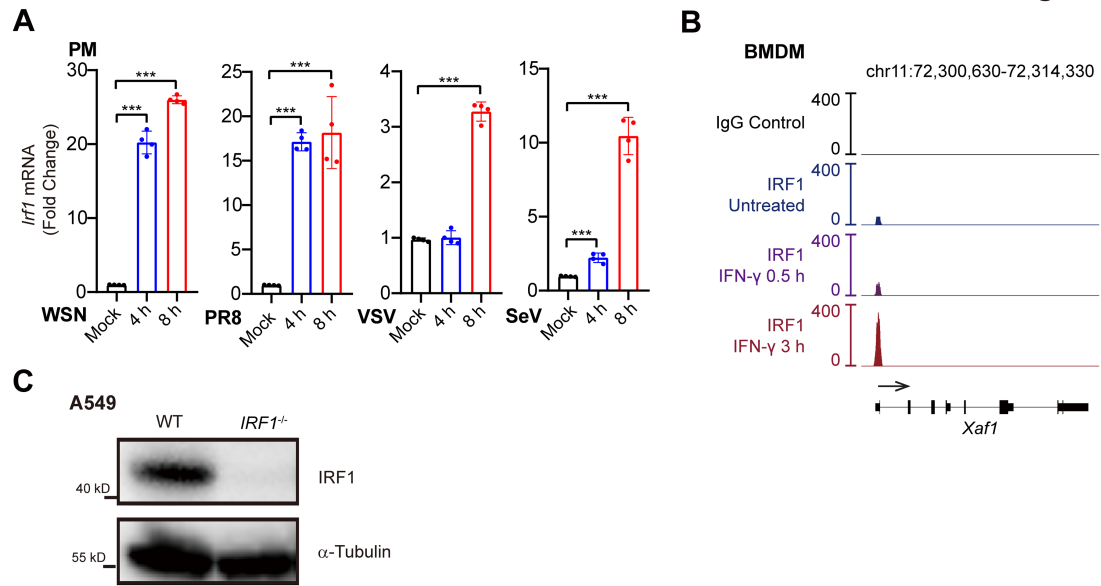

14 **Fig. S2.** Induction of IRF1 binding to the promoter of *XAF1* and verification of  
 15 the *IRF1*<sup>-/-</sup> A549 cells. (A) qRT-PCR analysis of *Ifi1* mRNA expression in the  
 16 PMs infected with WSN (MOI 0.1), PR8 (MOI 0.1), VSV (MOI 1), and SeV(MOI  
 17 0.1) for the indicated time points. (B) BMDMs were treated with 400 U/ml IFN-  
 18  $\gamma$  for the indicated time points, IRF1 ChIP-Seq data were analyzed, and the  
 19 IRF1 binding regions in the *Xaf1* promoter are shown. The IRF1 ChIP-Seq raw  
 20 data were downloaded from GEO (accession no. GSE77886). (C) Immunoblot  
 21 analysis of IRF1 protein in the WT and *IRF1*<sup>-/-</sup> A549 cells. Data of (A) from three  
 22 independent experiments are presented as mean  $\pm$  SD; \*\*\* $P$  < 0.001 indicates  
 23 significant difference by unpaired Student's *t*-test; Data of (C) are representative  
 24 results of three independent experiments.

25

26

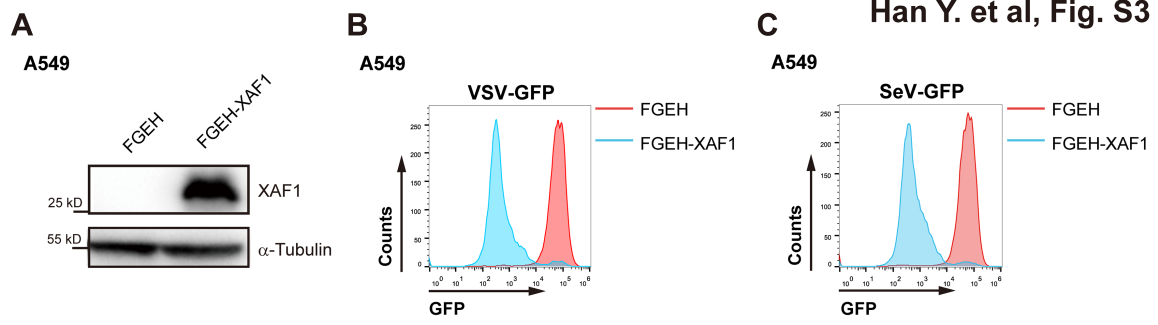

27 **Fig. S3.** XAF1 protects host against VSV and SeV. (A) Immunoblot analysis of  
 28 XAF1 expression in the A549 cells stably overexpressing XAF1. (B and C) Flow  
 29 cytometry analysis of GFP fluorescence intensity in the FGEH and FGEH-  
 30 XAF1-expressing A549 cells infected with VSV-GFP (MOI 1) for 8 h (B) or SeV-  
 31 GFP (MOI, 0.1) for 8 h (C). All data are representative results of three  
 32 independent experiments.

33

34

35

36

37

38

39

40

41

42

43

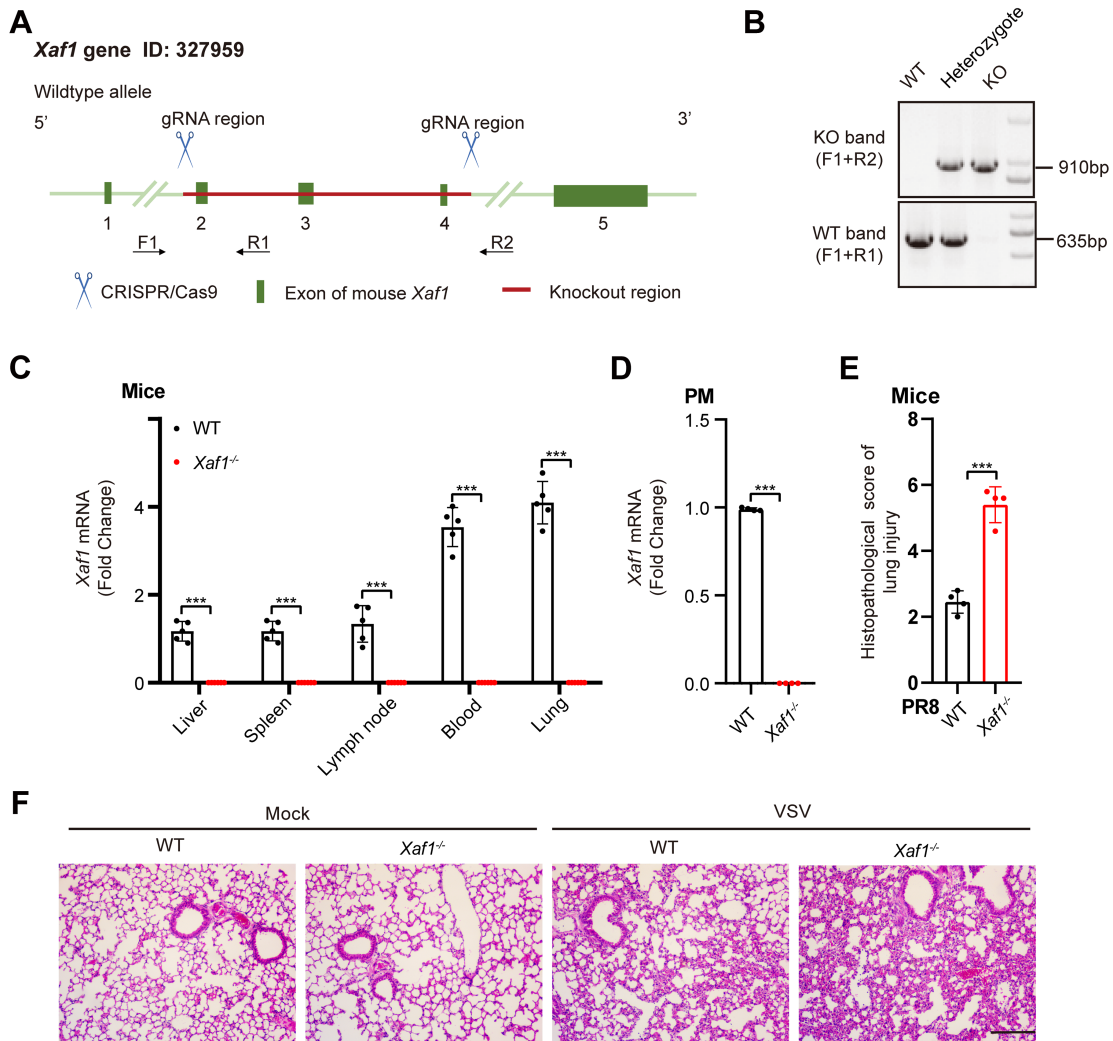

44

45 **Fig. S4.** Knockout of XAF1 facilitates RNA virus infection *in vivo*. (A) The *Xaf1*  
46 was deleted in the C57BL/6N background mouse chromosome by  
47 CRISPR/Cas9 targeting strategy. (B) Genotyping examinations of the WT,  
48 *Xaf1*<sup>+/-</sup>, and *Xaf1*<sup>-/-</sup> mice by PCR. (C) qRT-PCR analysis of *Xaf1* mRNA level in  
49 the livers, spleens, lymph nodes, peripheral blood, and lungs from the WT (n=5)  
50 and *Xaf1*<sup>-/-</sup> (n=6) mice. (D) qRT-PCR analysis of *Xaf1* mRNA level in the WT  
51 and *Xaf1*<sup>-/-</sup> PMs. (E) Histopathological evaluation of the lung injury in the lung

52 sections from the WT and *Xaf1*<sup>-/-</sup> mice infected with PR8 (100 pfu) intranasally  
53 for 5 d. (F) Histopathological examination of the lung sections from the WT and  
54 *Xaf1*<sup>-/-</sup> mice given intraperitoneal injection of VSV ( $2 \times 10^7$  pfu/g) for 3 d was  
55 performed by H&E staining; scale bar, 150  $\mu$ m. Data of (C-E) from three  
56 independent experiments are presented as mean  $\pm$  SD; \*\*\**P* < 0.001 indicates  
57 significant difference by unpaired Student's *t*-test; Data of (F) are representative  
58 results of three independent experiments.  
59

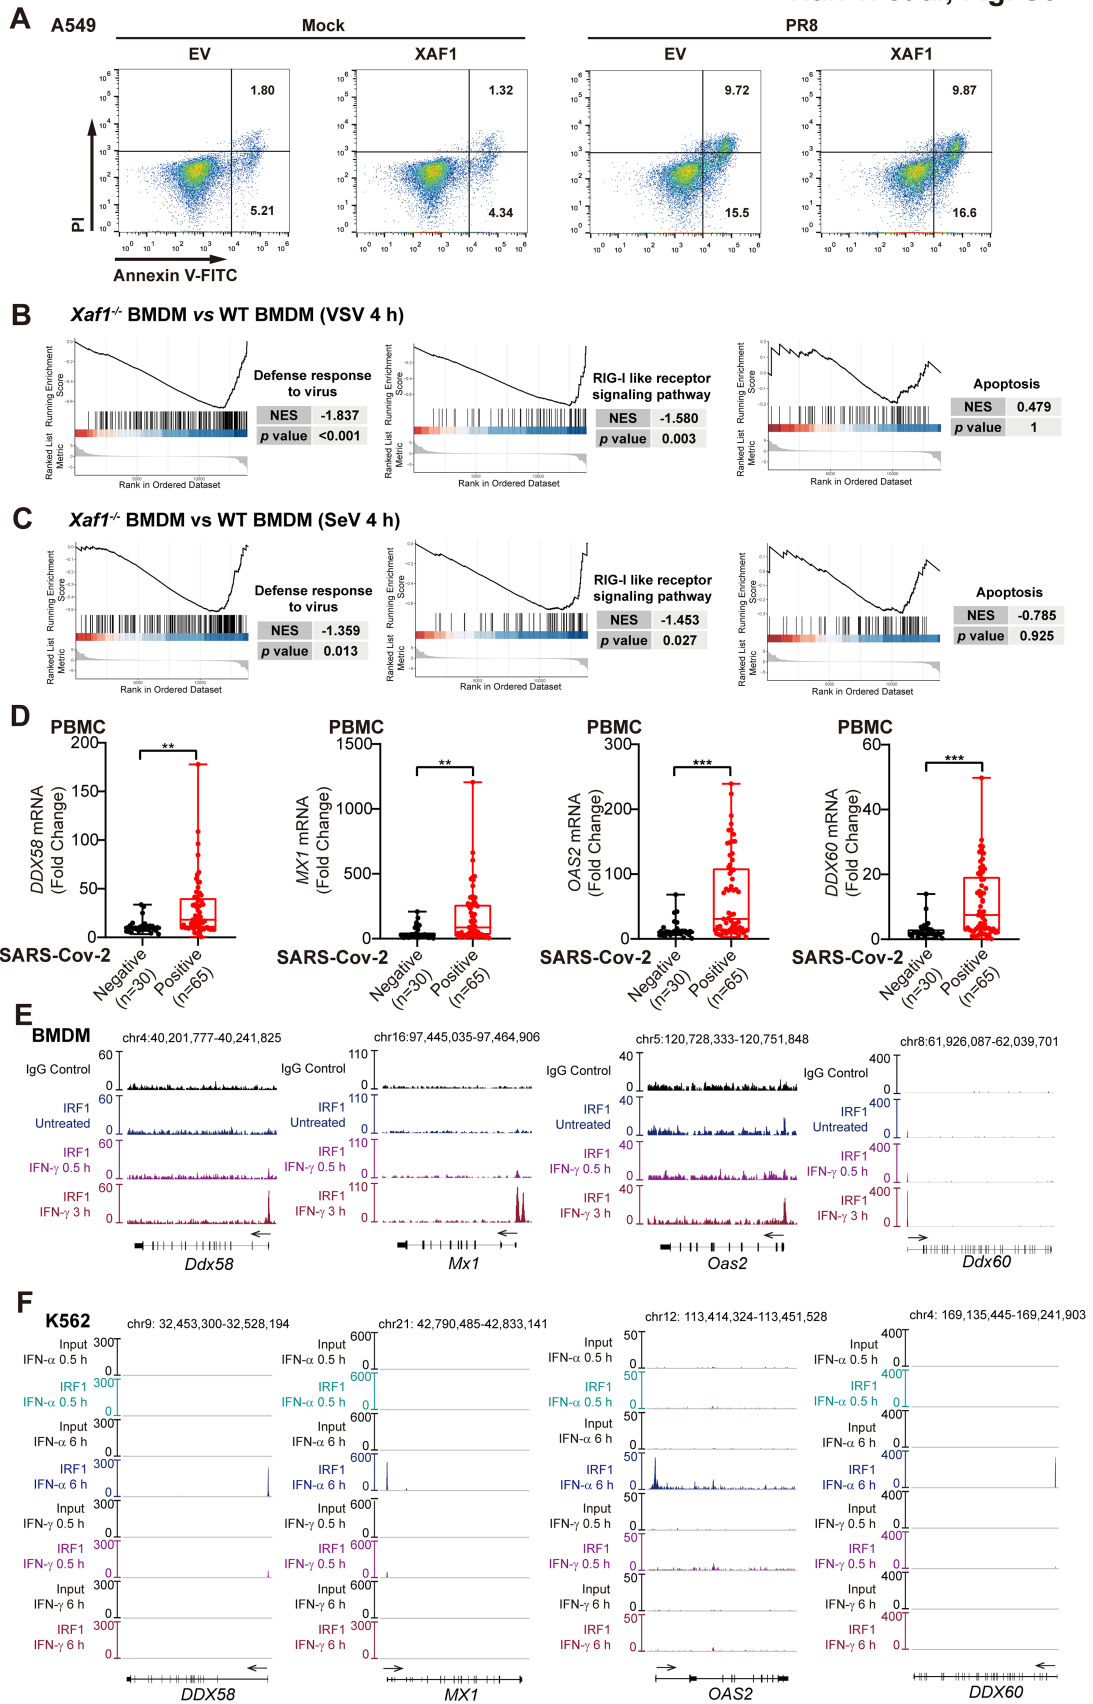

61 **Fig. S5.** Attenuated induction of IRF1 target genes in the *Xaf1*<sup>-/-</sup> macrophages.

62 (A) Flow cytometry analysis of cell apoptosis in the A549 cells transfected with

63 empty vector (EV) or XAF1 plasmid, followed by PR8 infection (MOI 2) for 24

64 h. (B and C) GSEA analysis of GO and KEGG gene sets for the *Xaf1*<sup>-/-</sup> BMDMs,

65 comparing with the WT BMDMs after VSV-infection (B) and SeV-infection (C).

66 NES < -1 and *P* < 0.05 indicate lower expression of genes related with Defense

67 response to virus and RIG-I like receptor signaling pathway. No significance in

68 Apoptosis signaling pathway between the WT and *Xaf1*<sup>-/-</sup> cells during viral

69 infection. (D) The PBMCs were from healthy controls (n=30) and SARS-CoV-

70 2-positive COVID-19 patients (n=65). Indicated genes (*DDX58*, *MX1*, *OAS2*,

71 *DDX60*) mRNA levels of these samples were analyzed by RNA-seq. (E)

72 BMDMs were treated with 400 U/ml IFN- $\gamma$  for the indicated time points, IRF1

73 ChIP-Seq data were analyzed, and the IRF1 binding regions in the indicated

74 promoters are shown. The IRF1 ChIP-Seq raw data were downloaded from

75 GEO (accession no. GSE77886). (F) K562 cells were treated with IFN- $\alpha$  or IFN-

76  $\gamma$  for the indicated time points, IRF1 ChIP-Seq data were analyzed, and the

77 IRF1 binding regions in the indicated promoters are shown. The IRF1 ChIP-

78 Seq raw data were downloaded from GEO (accession no. GSE31477). Data of

79 (D) from three independent experiments are presented as mean  $\pm$  SD; \*\**P* <

80 0.01, \*\*\**P* < 0.001 by unpaired Student's *t*-test. Data of (A, F) are representative

81 results of three independent experiments.

82

A

**DDX58 promoter**

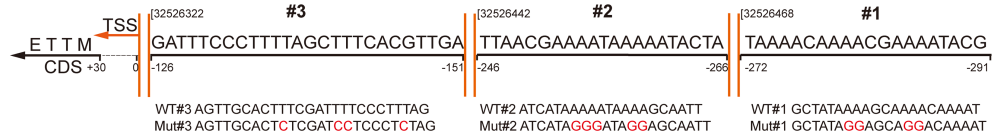

B

**MX1 promoter**

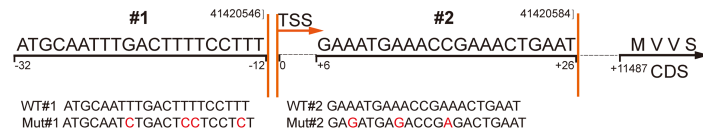

C

**OAS2 promoter**

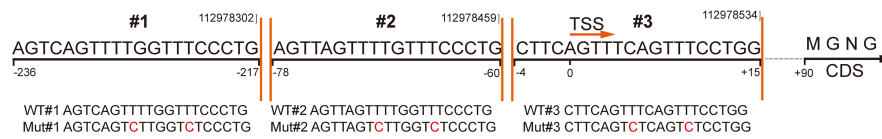

D

**DDX60 promoter**

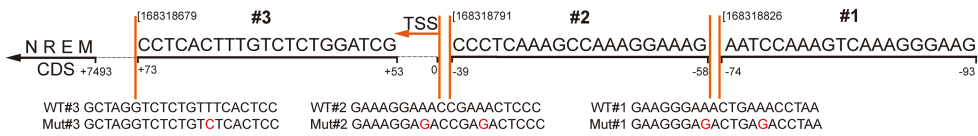

83

84 **Fig. 6.** Potential IRF1 binding sites in the promoters of IRF1 targeted gene. (A)

85 The model of potential IRF1 binding sites in the *DDX58* promoter. (B) The model

86 of potential IRF1 binding sites in the *MX1* promoter. (C) The model of potential

87 IRF1 binding sites in the *OAS2* promoter. (D) The model of potential IRF1

88 binding sites in the *DDX60* promoter.

89

90



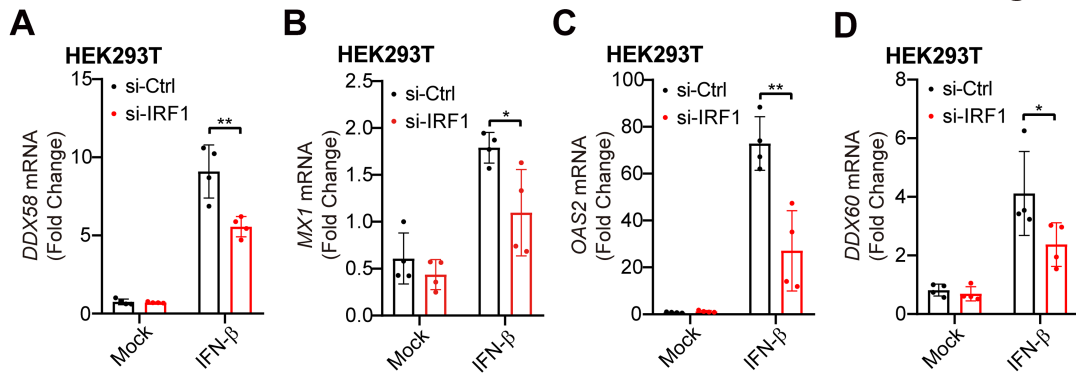

92 **Fig. S7.** Attenuated induction of IRF1 target genes after IRF1 knockdown. (A-  
 93 D) qRT-PCR analysis of *DDX58* (A), *MX1* (B), *OAS2* (C), and *DDX60* (D) mRNA  
 94 levels in HEK293T cells pretreated for 48 h with IRF1 siRNA, followed by IFN-  
 95  $\beta$  (100 U/ml) treatment for 6 h. All data from three independent experiments are  
 96 presented as mean  $\pm$  SD; \* $P < 0.05$  and \*\* $P < 0.01$  indicate significant  
 97 differences by unpaired Student's *t*-test.
